# Supplementary material for: Agro-Based Spent Mushroom Compost Substrates Improve Soil Properties and Microbial Diversity in Greenhouse Tomatoes
Source: MDPI journal article supplement (doi:10.3390/agronomy13092291), 2023-08-30
Supplement: s1 [file s1]

Archive with 1 entries (1 files):
- agronomy-2518622-supplementary.pdf
